# Supplementary material
Source: HighWire-hosted journal article supplement (http://rc.rcjournal.com/highwire/filestream/16387/field_highwire_adjunct_files/0/suppl_1.pdf)
Supplement: suppl_1.pdf [file suppl_1.pdf]

A)

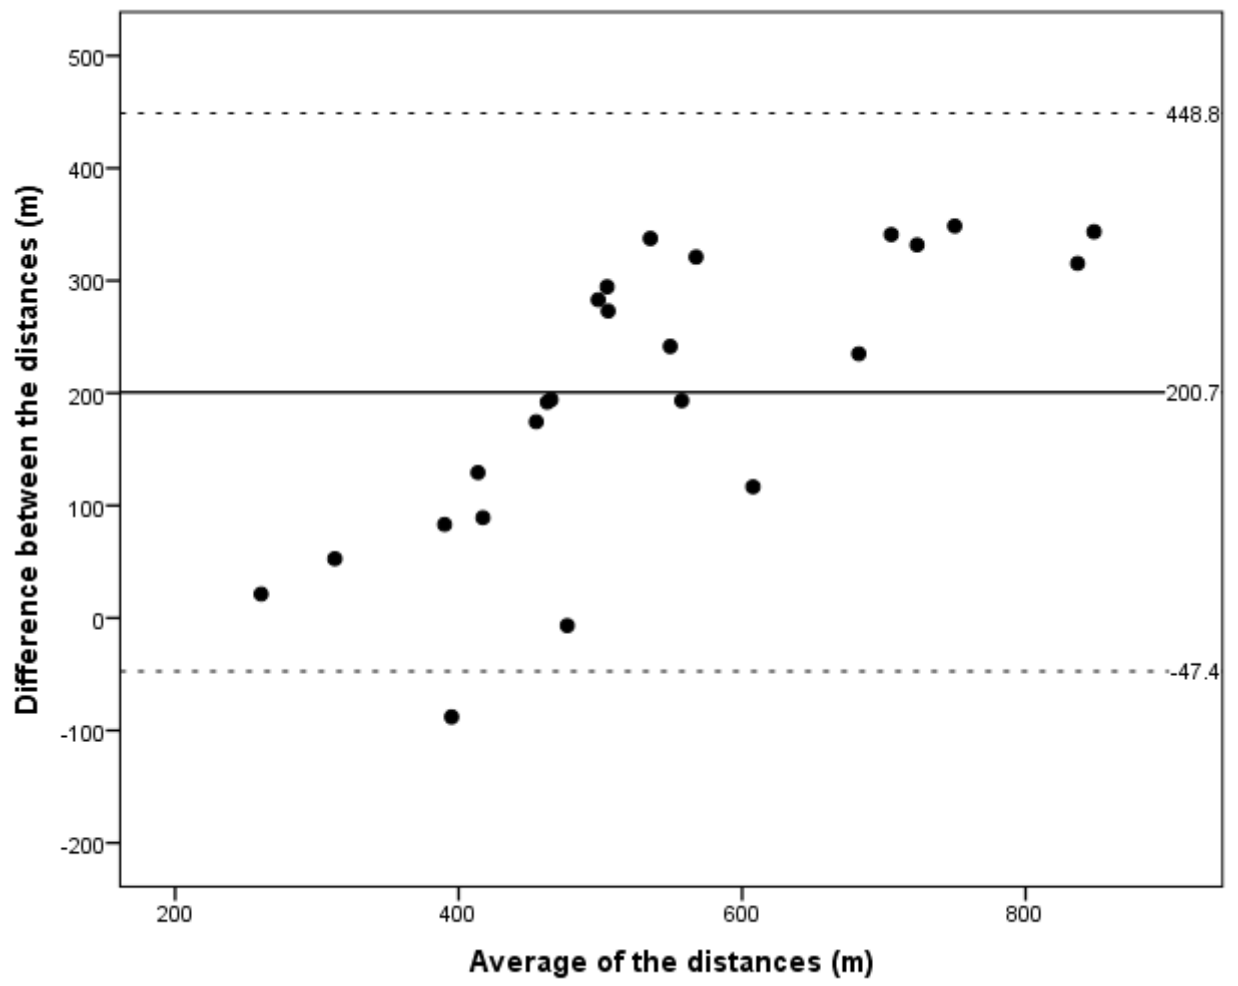

B)

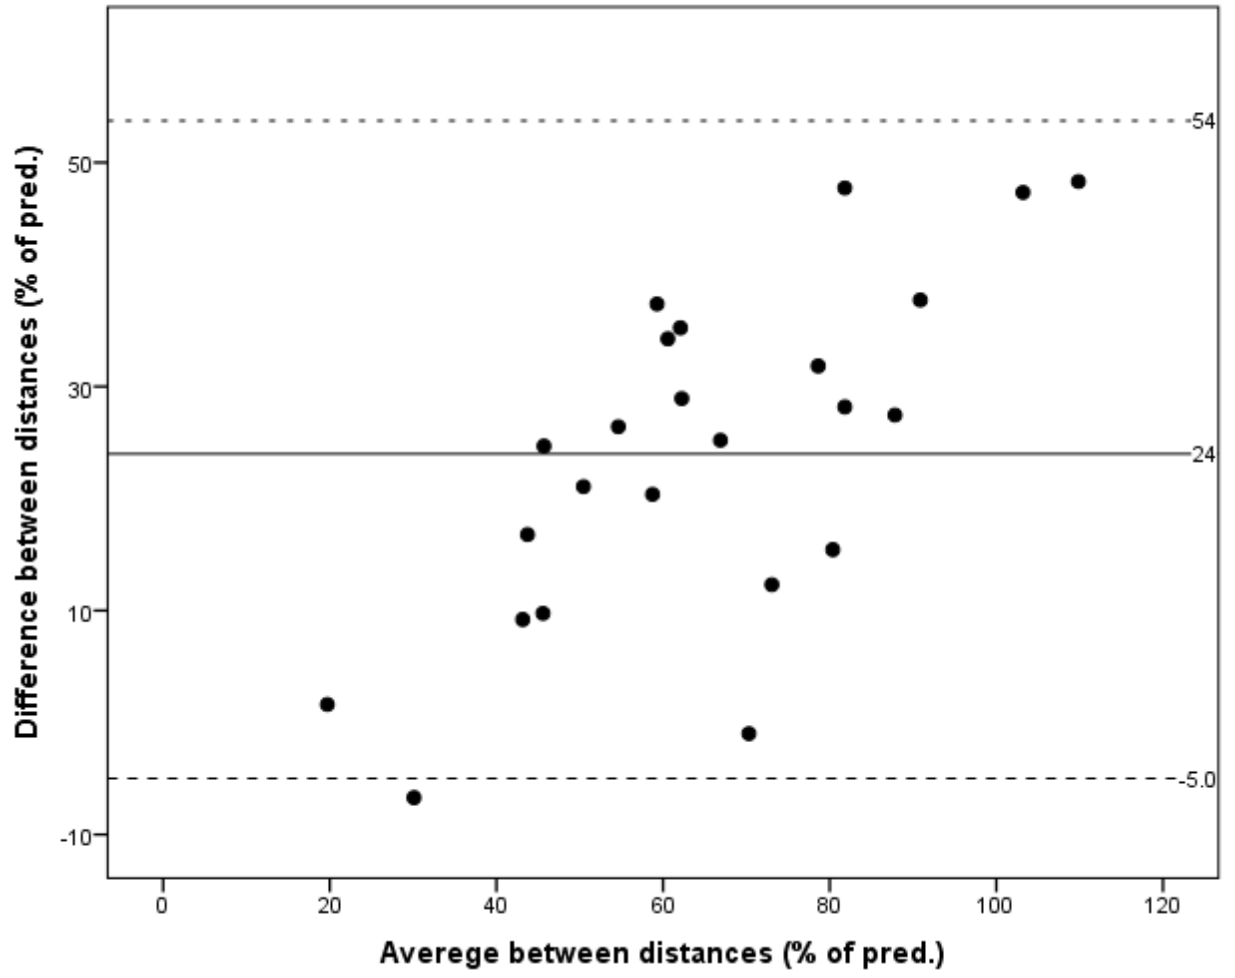

C)

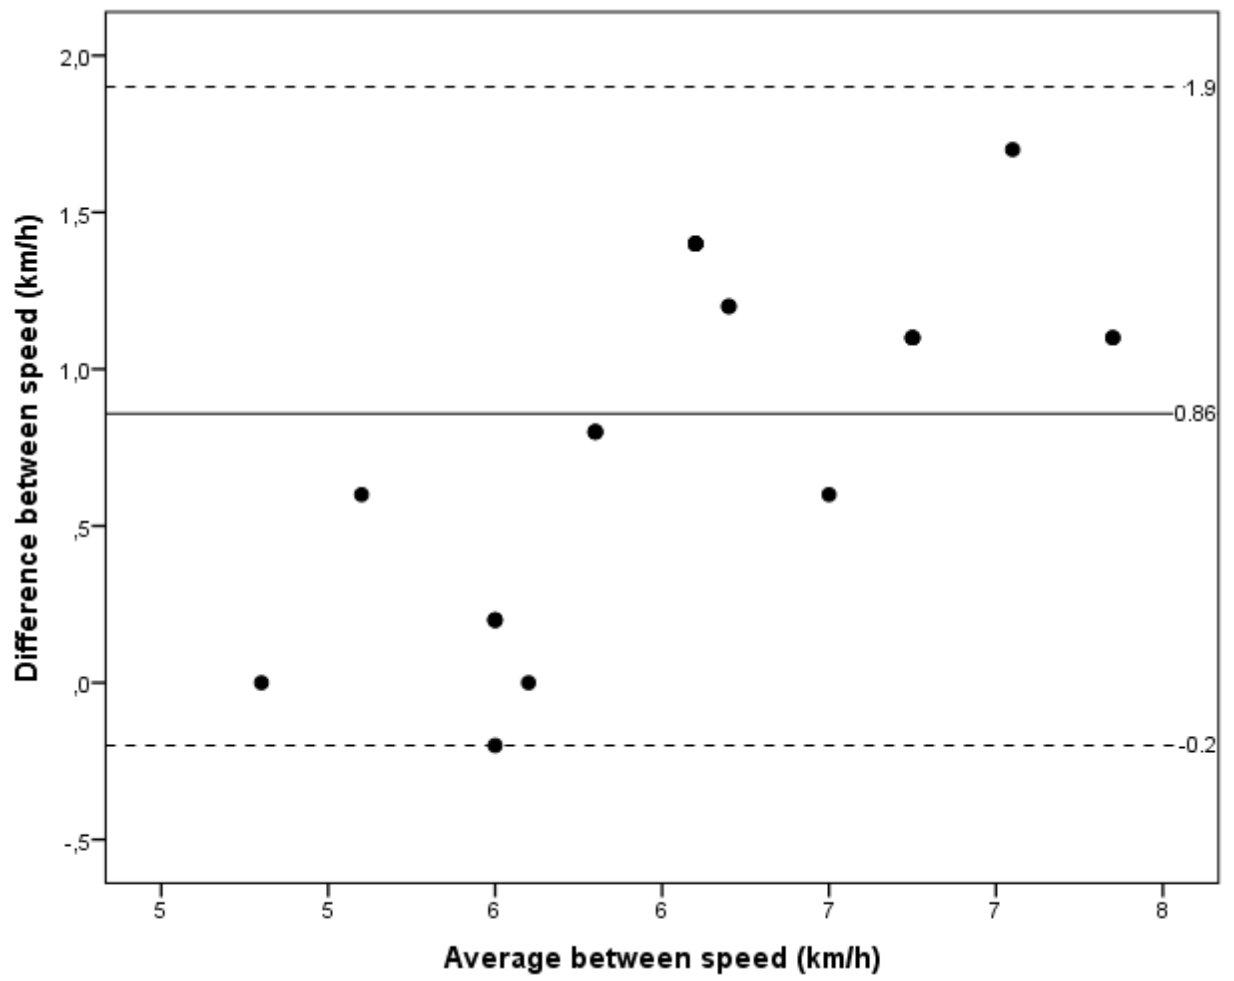

Supplementary Figure: Bland Altman Analysis for A) distance, B) percentage of the predicted distance and C) speed between ISWT-T and ISWT-H
